# Supplementary material
Source: Springer Nature journal article supplement (https://www.springermedizin.de/resource/supplementary/12885_2013_4254_MOESM3_ESM.pdf/9466380)

**A**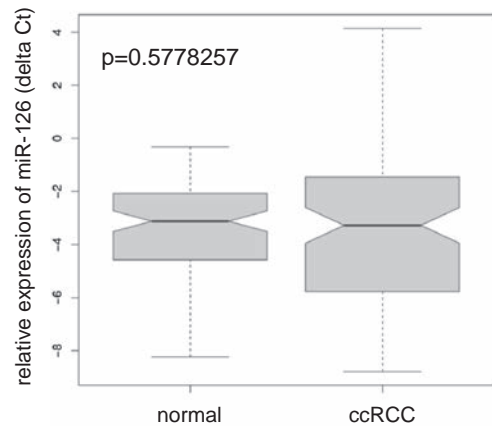

relative expression of miR-21 (delta Ct)

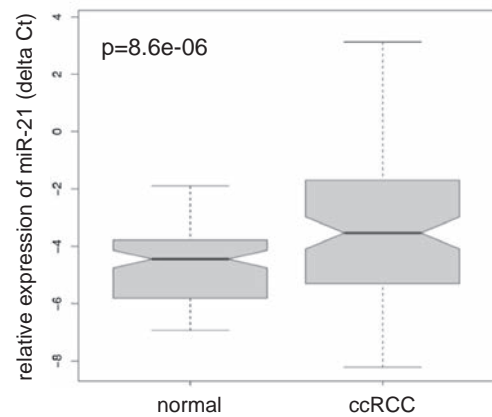**B**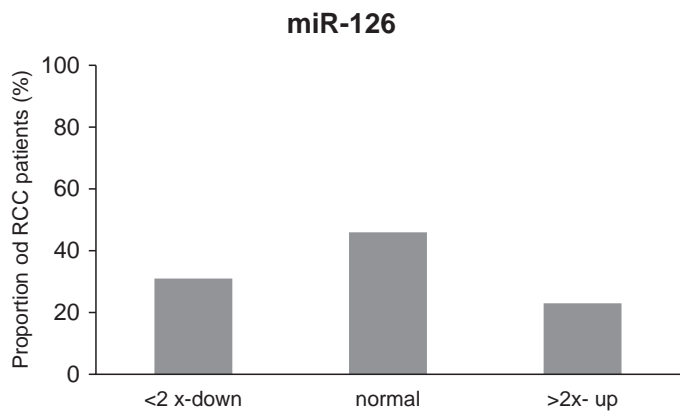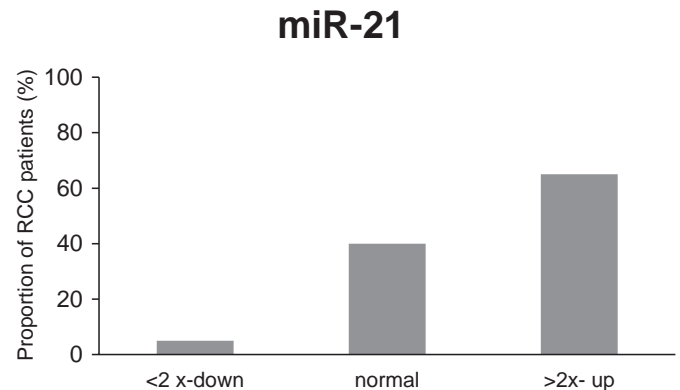

Supplement: MOESM3 [file 9466380]
